# Supplementary material for: The effects of acute hydrogen peroxide exposure on respiratory cilia motility and viability
Source: PeerJ. 2023 Feb 27;11:e14899. doi: 10.7717/peerj.14899 (PMC9979836; doi:10.7717/peerj.14899)
Supplement: Supplemental Information 2 [file peerj-11-14899-s002.docx]

| Nebulized H2O2 Claim(s) | H2O2 Dose/Route | | Treatment time | | Reference URL | |
| --- | --- | --- | --- | --- | --- | --- |
| "Nebulized hydrogen peroxide therapy is an inexpensive and simple way to treat most viral respiratory illnesses"  "can be anticipated to eliminate eventual fatal disease outcomes in all but the most advanced cases" | | Household 3% H2O2 (or diluted), nebulizer with a face mask that covers mouth and nose | | 10-15 minutes, four times a day, until symptoms are relieved | | | <https://archive.ph/Eq1iy> | | --- | | |
| "As it is a completely non-toxic therapy, nebulisation can be administered as often as desired."  H2O2 inactivates "dangerous infectious viruses"  "Don’t wait for initial symptoms. Just nebulise at your first opportunity" | | Common household H2O2 diluted to 3%, nebulizer that covers mouth and nose and emits a fine mist | | begin treatment at first signs of symptoms 10-15 mins four times a day | | | <https://archive.ph/IUopG> | | --- | | |
| H2O2 nebulizer treatment ten minutes every waking hour cured flu within 72 hours  Used to treat "hundreds of cases of colds, flus, sinusitis, and bronchitis all with the same great results." | | Nebulized H2O2, dose not listed | | ten minutes every waking hour | | | <https://archive.ph/fXjdK> | | --- | | |
| "H2O2 has many functions, but one of its greatest benefits is aiding the body in ridding viruses."[sic]  "These treatments can be used preventively as well. Daily H2O2 nebulization therapy may be helpful at stopping even low levels of viral growth, perhaps even undetected by the body." | | Nebulized 3% H2O2 (full strength or diluted) | | If symptoms present, then 10 min sessions "4 times a day minimally" until feeling better. | | | <https://archive.ph/zPanN> | | --- | | |
| "Nebulization of hydrogen peroxide the solution for colds, flus and respiratory infections"  "Our favorite substance to nebulizes [sic] is hydrogen peroxide…. because it is extremely safe" | | Nebulized H2O2, dose not listed | | Treatment time not listed | | | <https://archive.ph/aNh69> | | --- | | |
| "At home treatment that can cure any virus, including coronavirus"  "As it is a completely non-toxic therapy, nebulization can be administered as often as desired." | | Nebulized 3% H2O2 | | 10-minute sessions 4 times a day until feeling better | | | <https://archive.ph/Rc39v> | | --- | | |
| "can help alleviate the symptoms of …. Asthma, Cold and Flu, COVID, Upper Respiratory Infections, Allergy symptoms, Toxic Mold, Chronic Infections" | | Nebulized 3% H2O2 with magnesium sulfate | | 10 to 15 minutes | | | <https://archive.ph/SEQpa> | | --- | | |

Supplementary Table 1. Selected online complementary and alternative medicine (CAM) references that recommend nebulized H2O2 to treat disease, including suggested H2O2 dose, route, and treatment time.
