# Supplementary material for: The effects of acute hydrogen peroxide exposure on respiratory cilia motility and viability
Source: PeerJ. 2023 Feb 27;11:e14899. doi: 10.7717/peerj.14899 (PMC9979836; doi:10.7717/peerj.14899)
Supplement: Supplemental Information 10 — A total of 40 mice were used for this study. Trachea from 30 mice were used for microscopy assessment of cilia motility and cilia generated flow, where each trachea was cut into four sections and assigned to a different treatment/time group providing an n = 6 for each treatment (Sham or H2O2) at each time point (0, 30, 60, 120 min). For quantification of epithelial damage by fluorescent microscopy, trachea from 10 mice were subdivided to provide an n = 6 for each treatment (Sham or H2O2) at the 120-min time point. [file peerj-11-14899-s010.xlsx]

## Sheet: motile %
sham
0 Min	100	100	91.6667	100	100	92.3077	100	100	100		88.8889	100	100	91.6667	100	100	100	100	100	100	94.7368
30 Min	90.9091	85.7143	92.3077	100	100	100	100	100	90	100	100	100	100	92.8571	100	100	100	92	100	100
60 Min	90.9091	100	90.9091	100	100		100	100	92.3077		88.8889	100		100	100	93.3333		100	95.4545	100
120 Min	100	100	100	100	100	100	92.3077	100			100	100	80.9524	100	100	100		100	100	100
6 hr	100	100	100	94.12	100	85.71	100	90	100
12 hr	100	92.9	92.3	80	83.33	100	100	88.89	94.74	100	93.75
24 hr	88.9	100	100	100	100	100	100	100	100	90
0.001
0 Min	0	40	85.7143	25	12.5	11.7647	27.2727	81.8182	0	25	0	0	34.7826	0	100	75	60
30 Min	71.4286	90.9091	83.3333	80	76.9231	81.8182	33.3333	83.3333	90.9091	81.8182	100	87.5
60 Min	92.8571	100	92.8571	100	50	80	80	80	85.7143	100	83.3333	90	66.6667	27.2727	70	100	84.6154	91.6667	100	85.7143	100
120 Min	66.6667	100	100	100	50	100	100	83.3333	100	83.3333	100	91.6667	87.5	70	81.8182	42.8571
0.002
0 Min	0	0	12.5	9.09091	20	20	9.09091	12.5	0	9.09091	0	0	0	0	0	0	0
30 Min	0	50	0	90.9091	91.6667	90	60	43.75	47.3684	0	37.5	66.6667	25	36.3636	66.6667	50	66.6667
60 Min	23.8095	55.5556	60	72.7273	81.25	69.2308	80	100	88.8889	100	80	20	40	42.8571	50	42.8571	61.5385	60	71.4286	71.4286	100
120 Min	100	85.7143	60	100	83.3333	66.6667	55.5556	58.3333	86.6667	75	53.8462	53.8462	25	16.6667	9.09091	20	75	75	100	0
0.005
0 Min	0	0	0	0	0	0	0	0	0	0	0	0	0	0	0	0	0	0	0	0
30 Min	0	0	0	0	0	0	0	0	0	0	0	0	0	20	54.5455	31.25	0	71.4286	33.3333	33.3333
60 Min	88.8889	90.9091	0	44.4444	40	22.2222	38.4615	50	16.6667	0	28.5714	33.3333	16.6667	0	0	16.6667	9.09091	66.6667	62.5	0	0	0	0
120 Min	0	0	0	70	75	75	80	91.6667	30.7692	16.6667	28.5714	0	54.5455	38.4615	100	0	0	0	0	90.9091	55.5556	66.6667	63.6364	80
0.01
0 Min	0	0	0	0	0	0	0	0	0	0	0	0	0	0	0	0	0	0	0	0
30 Min	0	0	0	0	0	0	0	0	0	0	0	0	0	0	0	0
60 Min	0	0	0	0	0	0	0	0	0	0	0	0	6.25	0	0	0	0	0
120 Min	0	0	0	0	0	0	0	0	0	0	0	0	0	0	0

## Sheet: CBF
sham
0 Min	20.625	11	21.25	25.75	22.25	23.5	28.25	24	25.25	23	14	21	24.375	23.25	20.25	24.75	24.5	24	24.75	20.75
30 Min	22.5	16.25	12.75	14	26	20.5	19	19.25	27.375	19	20.25	24.375	21.75	25.75	22.25	29.75	14.5	15.25	14.75	13.5	15.75
60 Min	23.75	28	28.75	14.75	13.75	15	21	24.25	18	13.25	25	19.625	20	16.5	19.25	17.25	16.75
120 Min	26	21.25	29.875	22.3333	27.3333	28.25	26.5	28.5	29.125	23.75	19.875	18.3333	19.25	15.75	21.25	18.5
6 hr	8.4	11.2	16.4	17.2	16.2	26.6	28.5	20.4	29.2857
12 hr	16.875	12.6	13	21.3333	15.8	27.8	31.5	25	21.5	26.8	27.2857
24 hr	27.5	20.8	32.125	27.75	31.6	31	37.5	37.4	29.8571	32
0.001
0 Min	7.5	6	4	5	3.5	4.33333	5.83333	4.4	3.625	4.8	4.75
30 Min	15	8.25	9.3	15.8	16.5	20.8	29	15.1667	23.4	19.3333	19	11.625
60 Min	12.625	14.4286	18.2143	11.4	16.2	11.6667	18.4	13.25	22.3333	13.6	27.4167	20.5	23.5714	16.375	19	22.375
120 Min	14.2	16.1875	12.6429	8.66667	11.6667	11.3333	22.3	22	19.8333	10.625	10.6	10.5
0.002
0 Min	5	4	5	5	5	5	5
30 Min	6	15.1667	14	17.7	11	8.33333	8.85714	11.75	15	18	15	10.25	11	16.5
60 Min	9.6	15.2	10.3333	17	10.3333	9.41667	16.8	14	13.9167	10.8333	11	21	14.75	6.66667	15.3333	13.2857	11.5714	19.5	10.6	17	13.3333
120 Min	12	10.1667	11.3333	15	13.75	10.75	11.75	13.8	25.6667	18.25	8.83333	8.33333	4	3	9	11.75	9.96575	10
0.005
0 Min	0	0	0	0	0	0
30 Min	8.5	15.25	10.8	16.8	17
60 Min	15.7	8.8	10.6667	12	10.5	14.8	12.8333	6	9	11	10.5	12	5	12	10
120 Min	14.2	9.6	11.6	10.5714	15.5	10.7857	11.3333	13.25	5	11	9.33333	9	15.7	12.2	7	11.2	10.3
0.01
0 Min	0	0	0	0	0	0	0	0	0	0	0	0	0	0	0	0	0	0	0	0	0	0	0	0	0
30 Min	0	0	0	0	0	0	0	0	0	0	0	0	0	0	0	0	0	0	0	0	0	0	0	0	0
60 Min	0	0	0	0	0	0	0	0	0	0	0	0	0	0	0	0	0	0	0	0	0	0	0	0	0
120 Min	0	0	0	0	0	0	0	0	0	0	0	0	0	0	0	0	0	0	0	0	0	0	0	0	0

## Sheet: Flow condensed
Sham	Velocity (µm/sec)
0 Min	33.84	31.49	19.88	32.47	37.14	21.23	26.22	35.2438	52.2512	31.5301	31.5179	38.2046
30 Min	35.77	31.52	37.48	28.18	37.44	25.27	33.64
60 Min	13.88	39.66	33.54	34.32	23.44	48.92	38.72
120 Min	36.8	23.9		37.78	23.7	39.53	47.07
6 hr	20.4354	36.4591	42.9536	30.9743
12 hr	18.0518	14.7162	11.3465	49.3024
24 hr	17.1123	58.8425	54.3049	59.5249
Sham	Directionality (Ratio)
0 Min	0.91	0.92	0.89	0.89	0.93	0.84	0.93	0.822509	0.952797	0.866255	0.860023	0.914431
30 Min	0.91	0.91	0.96	0.9	0.93	0.92	0.92
60 Min	0.78	0.91	0.9	0.93	0.81	0.97	0.84
120 Min	0.9	0.89		0.95	0.88	0.96	0.95
6 hr	0.801212	0.957324	0.770796	0.885573
12 hr	0.71599	0.86836	0.827241	0.900256
24 hr	0.829226	0.969907	0.946627	0.928366
0.001	Velocity (µm/sec)
0 Min	6.18762	14.5562		5.02176	4.31358	6.44388
30 Min	10.3629	22.6435		17.7629	16.7793	21.2098
60 Min	11.4515	12.5215	21.4025	11.3933	25.2129	9.93108
120 Min	14.9704		10.4641		13.9346	11.2587
0.001	Directionality (Ratio)
0 Min	0.27002	0.75933		0.277509	0.295729	0.391704
30 Min	0.771135	0.83717		0.811225	0.822233	0.874355
60 Min	0.587573	0.783441	0.878994	0.758317	0.821069	0.789839
120 Min	0.855051		0.841498		0.825885	0.891707
0.002	Velocity (µm/sec)
0 Min	5.85698	5.44666		4.66047	7.46633	5.12376
30 Min	5.74455	13.0677		5.55737	7.2287	12.5757
60 Min	9.14638	13.595	11.5146	5.45641	10.1247	14.7597
120 Min	4.99119	12.185	16.1436	21.0422	8.28139	5.97363
0.002	Directionality (Ratio)
0 Min	0.238669	0.290047		0.165541	0.154661	0.160932
30 Min	0.22128	0.685404		0.705061	0.153895	0.677606
60 Min	0.458348	0.774874	0.749679	0.34755	0.730801	0.889789
120 Min	0.320443	0.697148	0.693869	0.895482	0.7377	0.233608
0.005	Velocity (µm/sec)
0 Min	7.15234	5.00809	6.72175	5.87059	6.86527		7.28129
30 Min	6.57109	4.51733	6.22001	7.50288	5.47965		5.25116
60 Min	12.8116	7.70332	5.11775	5.65	5.97048	6.08034	4.94579
120 Min	7.53392	15.7811	12.3568	4.96471	17.8098	5.70043	7.30009
0.005	Directionality (Ratio)
0 Min	0.243124	0.210489	0.330269	0.143033	0.143356		0.216052
30 Min	0.19367	0.225867	0.248262	0.116531	0.12677		0.334863
60 Min	0.786778	0.114206	0.202398	0.245955	0.171022	0.145035	0.135833
120 Min	0.210437	0.833085	0.888152	0.184341	0.788353	0.151217	0.738572
0.01	Velocity (µm/sec)
0 Min	8.54747	6.81051	5.7705	5.83386	4.72243	3.27573
30 Min	8.09951	5.28755	6.24336	5.01479	5.28631	5.27288
60 Min	6.64634	6.34165	6.01844	5.81037	5.08961	5.90496
120 Min	6.11338	6.04184	5.82365	5.56446	4.10148	4.89602
0.01	Directionality (Ratio)
0 Min	0.180136	0.236588	0.184241	0.260131	0.148659	0.280478
30 Min	0.10792	0.12182	0.267632	0.107199	0.148644	0.171803
60 Min	0.145532	0.156141	0.179425	0.218915	0.219887	0.206838
120 Min	0.0824749	0.248732	0.326953	0.157047	0.223155	0.257722

## Sheet: Dead Staining
																						non cilated?
	date	treatment	sample	area	total cells	total ciliated	total uncilated	total dead	dead epithelia	dead cilated		% ciliated	% non-ciliated	% cells dead	% epithelia dead	% ciliated cells dead	% of dead cells ciliated		% ciliated	% non-ciliated	% cells dead	% epithelia dead	% ciliated cells dead	% of dead cells ciliated
	211007	Sham	1-1	106.27µm2	284	193	91	18	4	14		0.679577	0.320423	0.0633803	0.043956	0.0725389	0.777778		67.9577	32.0423	6.33803	4.3956	7.25389	77.7778
			1-2		392	111	281	3	1	2		0.283163	0.716837	0.00765306	0.00355872	0.018018	0.666667		28.3163	71.6837	0.765306	0.355872	1.8018	66.6667
		Sham	2-1		300	169	131	0	0	0		0.563333	0.436667	0	0	0	#DIV/0!		56.3333	43.6667	0	0	0	#DIV/0!
			2-2		309	102	207	1	0	1		0.330097	0.669903	0.00323625	0	0.00980392	1		33.0097	66.9903	0.323625	0	0.980392	100
		Sham	3-1		255	55	200	0	0	0		0.215686	0.784314	0	0	0	#DIV/0!		21.5686	78.4314	0	0	0	#DIV/0!
			3-2		271	45	226	0	0	0		0.166052	0.833948	0	0	0	#DIV/0!		16.6052	83.3948	0	0	0	#DIV/0!
	211112	Sham	1-1		239	120	119	12	0	12		0.502092	0.497908	0.0502092	0	0.1	1		50.2092	49.7908	5.02092	0	10	100
			1-2		256	85	171	0	0	0		0.332031	0.667969	0	0	0	#DIV/0!		33.2031	66.7969	0	0	0	#DIV/0!
		Sham	2-1		315	125	190	12	7	5		0.396825	0.603175	0.0380952	0.0368421	0.04	0.416667		39.6825	60.3175	3.80952	3.68421	4	41.6667
			2-2		201	66	135	0	0	0		0.328358	0.671642	0	0	0	#DIV/0!		32.8358	67.1642	0	0	0	#DIV/0!
		Sham	3-1		247	67	180	0	0	0		0.271255	0.728745	0	0	0	#DIV/0!		27.1255	72.8745	0	0	0	#DIV/0!
			3-2		273	132	141	0	0	0		0.483516	0.516484	0	0	0	#DIV/0!		48.3516	51.6484	0	0	0	#DIV/0!
	211007	0.01	1-1		291	160	131	21	2	19		0.549828	0.450172	0.0721649	0.0152672	0.11875	0.904762		54.9828	45.0172	7.21649	1.52672	11.875	90.4762
			1-2		248	99	149	61	12	49		0.399194	0.600806	0.245968	0.0805369	0.494949	0.803279		39.9194	60.0806	24.5968	8.05369	49.4949	80.3279
		0.01	2-2		218	68	150	18	5	13		0.311927	0.688073	0.0825688	0.0333333	0.191176	0.722222		31.1927	68.8073	8.25688	3.33333	19.1176	72.2222
			3-1		232	64	168	87	39	48		0.275862	0.724138	0.375	0.232143	0.75	0.551724		27.5862	72.4138	37.5	23.2143	75	55.1724
		0.01	3-2		235	63	172	70	20	50		0.268085	0.731915	0.297872	0.116279	0.793651	0.714286		26.8085	73.1915	29.7872	11.6279	79.3651	71.4286
		0.01	4-1		277	92	185	36	7	29		0.33213	0.66787	0.129964	0.0378378	0.315217	0.805556		33.213	66.787	12.9964	3.78378	31.5217	80.5556
			4-2		211	75	136	51	29	22		0.35545	0.64455	0.241706	0.213235	0.293333	0.431373		35.545	64.455	24.1706	21.3235	29.3333	43.1373
	211112	0.01	1-1		221	71	150	16	7	9		0.321267	0.678733	0.0723982	0.0466667	0.126761	0.5625		32.1267	67.8733	7.23982	4.66667	12.6761	56.25
		0.01	2-1		248	77	171	36	11	25		0.310484	0.689516	0.145161	0.0643275	0.324675	0.694444		31.0484	68.9516	14.5161	6.43275	32.4675	69.4444
			2-2		196	72	124	39	18	21		0.367347	0.632653	0.19898	0.145161	0.291667	0.538462		36.7347	63.2653	19.898	14.5161	29.1667	53.8462
		0.01	3-1		273	101	172	24	6	18		0.369963	0.630037	0.0879121	0.0348837	0.178218	0.75		36.9963	63.0037	8.79121	3.48837	17.8218	75
	211007	0.001	1-1		209	70	139	1	0	1		0.334928	0.665072	0.00478469	0	0.0142857	1		33.4928	66.5072	0.478469	0	1.42857	100
			2-1		285	118	167	5	1	4		0.414035	0.585965	0.0175439	0.00598802	0.0338983	0.8		41.4035	58.5965	1.75439	0.598802	3.38983	80
			3-1		353	116	237	34	9	25		0.328612	0.671388	0.0963173	0.0379747	0.215517	0.735294		32.8612	67.1388	9.63173	3.79747	21.5517	73.5294
	211112	0.001	1-1		311	110	201	3	0	3		0.353698	0.646302	0.0096463	0	0.0272727	1		35.3698	64.6302	0.96463	0	2.72727	100
			2-1		315	94	221	4	2	2		0.298413	0.701587	0.0126984	0.00904977	0.0212766	0.5		29.8413	70.1587	1.26984	0.904977	2.12766	50
			3-1		256	138	118	1	0	1		0.539062	0.460938	0.00390625	0	0.00724638	1		53.9062	46.0938	0.390625	0	0.724638	100
	211112	0.002	1-1		207	83	124	1	0	1		0.400966	0.599034	0.00483092	0	0.0120482	1		40.0966	59.9034	0.483092	0	1.20482	100
			1-2		278	83	195	5	2	3		0.298561	0.701439	0.0179856	0.0102564	0.0361446	0.6		29.8561	70.1439	1.79856	1.02564	3.61446	60
			2-1		246	69	177	11	9	2		0.280488	0.719512	0.0447154	0.0508475	0.0289855	0.181818		28.0488	71.9512	4.47154	5.08475	2.89855	18.1818
			2-2		250	80	170	4	0	4		0.32	0.68	0.016	0	0.05	1		32	68	1.6	0	5	100
			3-1		304	80	224	9	3	6		0.263158	0.736842	0.0296053	0.0133929	0.075	0.666667		26.3158	73.6842	2.96053	1.33929	7.5	66.6667
			3-2		305	103	202	3	2	1		0.337705	0.662295	0.00983607	0.00990099	0.00970874	0.333333		33.7705	66.2295	0.983607	0.990099	0.970874	33.3333
	211007	0.002	1-1		392	90	302	28	7	21		0.229592	0.770408	0.0714286	0.0231788	0.233333	0.75		22.9592	77.0408	7.14286	2.31788	23.3333	75
			1-2		317	105	212	32	10	22		0.33123	0.66877	0.100946	0.0471698	0.209524	0.6875		33.123	66.877	10.0946	4.71698	20.9524	68.75
			2-1		214	86	128	11	0	11		0.401869	0.598131	0.0514019	0	0.127907	1		40.1869	59.8131	5.14019	0	12.7907	100
			2-2		301	104	197	22	5	17		0.345515	0.654485	0.0730897	0.0253807	0.163462	0.772727		34.5515	65.4485	7.30897	2.53807	16.3462	77.2727
			3-1		299	58	241	15	4	11		0.19398	0.80602	0.0501672	0.0165975	0.189655	0.733333		19.398	80.602	5.01672	1.65975	18.9655	73.3333
			3-2		256	61	195	21	2	19		0.238281	0.761719	0.0820312	0.0102564	0.311475	0.904762		23.8281	76.1719	8.20312	1.02564	31.1475	90.4762
	211007	0.005	1-1		245	56	189	13	3	10		0.228571	0.771429	0.0530612	0.015873	0.178571	0.769231		22.8571	77.1429	5.30612	1.5873	17.8571	76.9231
			2-1		300	94	206	10	3	7		0.313333	0.686667	0.0333333	0.0145631	0.0744681	0.7		31.3333	68.6667	3.33333	1.45631	7.44681	70
			3-1		251	77	174	22	8	14		0.306773	0.693227	0.0876494	0.045977	0.181818	0.636364		30.6773	69.3227	8.76494	4.5977	18.1818	63.6364
	211112	0.005	1-1		259	100	159	11	2	9		0.3861	0.6139	0.042471	0.0125786	0.09	0.818182		38.61	61.39	4.2471	1.25786	9	81.8182
			2-1		188	76	112	15	3	12		0.404255	0.595745	0.0797872	0.0267857	0.157895	0.8		40.4255	59.5745	7.97872	2.67857	15.7895	80
			3-1		200	94	106	41	14	27		0.47	0.53	0.205	0.132075	0.287234	0.658537		47	53	20.5	13.2075	28.7234	65.8537
			4-1		240	100	140	6	2	4		0.416667	0.583333	0.025	0.0142857	0.04	0.666667		41.6667	58.3333	2.5	1.42857	4	66.6667
												#DIV/0!	#DIV/0!	#DIV/0!	#DIV/0!	#DIV/0!	#DIV/0!		#DIV/0!	#DIV/0!	#DIV/0!	#DIV/0!	#DIV/0!	#DIV/0!
												#DIV/0!	#DIV/0!	#DIV/0!	#DIV/0!	#DIV/0!	#DIV/0!		#DIV/0!	#DIV/0!	#DIV/0!	#DIV/0!	#DIV/0!	#DIV/0!
												#DIV/0!	#DIV/0!	#DIV/0!	#DIV/0!	#DIV/0!	#DIV/0!		#DIV/0!	#DIV/0!	#DIV/0!	#DIV/0!	#DIV/0!	#DIV/0!
												#DIV/0!	#DIV/0!	#DIV/0!	#DIV/0!	#DIV/0!	#DIV/0!		#DIV/0!	#DIV/0!	#DIV/0!	#DIV/0!	#DIV/0!	#DIV/0!
												#DIV/0!	#DIV/0!	#DIV/0!	#DIV/0!	#DIV/0!	#DIV/0!		#DIV/0!	#DIV/0!	#DIV/0!	#DIV/0!	#DIV/0!	#DIV/0!
